# Supplementary material for: Seasonal and successional dynamics of size-dependent plant demographic rates in a tropical dry forest
Source: PeerJ. 2020 Sep 14;8:e9636. doi: 10.7717/peerj.9636 (PMC7497611; doi:10.7717/peerj.9636)
Supplement: Data S1 — Plant density, species density, recruitment, mortality, species loss rate and species gain rate of each sampling plot (arranged by successional age category) in each consecutive census, indicating the season (dry or wet), as used for all statistical analyses. [file peerj-08-9636-s013.xlsx]

## Sheet: Raw_data
Sucessional_stage	Plot_ID	Plant size	Season	Year	Plant density (ind/ha)	Species density	Mortality rate	Mortality evergreen species	Recruitment rate	Species loss rate	Species gain rate
Advanced	60A	> 5 cm	Dry	2010	1830	16	0.00514338	0.0075115	0	0	0
Advanced	60A	> 5 cm	Wet	2010	1840	16	0.0125426	0.0091104	0.0188521	0	0
Advanced	60A	> 5 cm	Dry	2011	1820	16	0.00835116	0.0119182	0	0	0
Advanced	60A	> 5 cm	Wet	2011	1830	16	0	0	0.00816885	0	0
Advanced	60A	> 5 cm	Dry	2012	1810	16	0.00796369	0.0056027	0	0	0
Advanced	60A	> 5 cm	Wet	2012	1790	16	0.023564	0.0327623	0.00789192	0	0
Advanced	60A	> 5 cm	Dry	2013	1850	18	0	0	0.0290871	0	0.107859
Advanced	60A	> 5 cm	Wet	2013	1860	18	0	0	0.00830746	0	0
Advanced	60A	> 5 cm	Dry	2014	1780	18	0.0305235	0.0157211	0	0	0
Advanced	60A	> 5 cm	Wet	2014	1770	18	0.027656	0.0364339	0.0208378	0	0
Advanced	60A	> 5 cm	Dry	2015	1760	18	0.00566906	0.0073781	0	0	0
Advanced	60A	> 5 cm	Wet	2015	1740	18	0.0171035	0.0221337	0.00570138	0	0
Advanced	60B	> 5 cm	Dry	2010	1130	19	0.00793391	0	0	0	0
Advanced	60B	> 5 cm	Wet	2010	1130	19	0	0	0	0	0
Advanced	60B	> 5 cm	Dry	2011	1130	19	0	0	0	0	0
Advanced	60B	> 5 cm	Wet	2011	1130	19	0	0	0	0	0
Advanced	60B	> 5 cm	Dry	2012	1140	19	0	0	0.00658913	0	0
Advanced	60B	> 5 cm	Wet	2012	1190	19	0	0	0.0602465	0	0
Advanced	60B	> 5 cm	Dry	2013	1210	19	0	0	0.014258	0	0
Advanced	60B	> 5 cm	Wet	2013	1200	19	0.0124472	0	0	0	0
Advanced	60B	> 5 cm	Dry	2014	1200	19	0	0	0	0	0
Advanced	60B	> 5 cm	Wet	2014	1190	19	0.0100039	0	0	0	0
Advanced	60B	> 5 cm	Dry	2015	1180	19	0.0080785	0	0	0	0
Advanced	60B	> 5 cm	Wet	2015	1170	19	0.00915467	0	0.00916093	0	0
Advanced	60C	> 5 cm	Dry	2010	1610	15	0.0114922	0.0132421	0.0286758	0	0
Advanced	60C	> 5 cm	Wet	2010	1650	15	0	0	0.0217076	0	0
Advanced	60C	> 5 cm	Dry	2011	1650	15	0	0	0	0	0
Advanced	60C	> 5 cm	Wet	2011	1650	15	0	0	0	0	0
Advanced	60C	> 5 cm	Dry	2012	1630	15	0.0215462	0.0245334	0.0128361	0	0
Advanced	60C	> 5 cm	Wet	2012	1640	16	0.0249995	0.0275238	0.0335929	0	0.0919421
Advanced	60C	> 5 cm	Dry	2013	1640	16	0	0	0	0	0
Advanced	60C	> 5 cm	Wet	2013	1640	15	0.0176271	0.0190146	0.017724	0.0893006	0
Advanced	60C	> 5 cm	Dry	2014	1660	15	0	0	0.00889397	0	0
Advanced	60C	> 5 cm	Wet	2014	1650	15	0.0140899	0.0149922	0.00705587	0	0
Advanced	60C	> 5 cm	Dry	2015	1640	15	0.00588784	0.0061879	0	0	0
Advanced	60C	> 5 cm	Wet	2015	1640	15	0	0	0.00659077	0	0
Advanced	60A	1- 5 cm	Dry	2010	7733.33	45	0.00812414	0	0	0	0
Advanced	60A	1- 5 cm	Wet	2010	7600	45	0.0197777	0	0.00495238	0	0
Advanced	60A	1- 5 cm	Dry	2011	7233.33	44	0.0338298	0	0	0.0170963	0
Advanced	60A	1- 5 cm	Wet	2011	6833.33	44	0.0676515	0	0	0	0
Advanced	60A	1- 5 cm	Dry	2012	6733.33	45	0.00710791	0	0.0106266	0	0.0164854
Advanced	60A	1- 5 cm	Wet	2012	6666.67	46	0.0211221	0	0.00707061	0	0.0318554
Advanced	60A	1- 5 cm	Dry	2013	6700	45	0.00870212	0	0.00869078	0.0189323	0
Advanced	60A	1- 5 cm	Wet	2013	6500	42	0.0228138	0	0.00764529	0.100468	0
Advanced	60A	1- 5 cm	Dry	2014	6300	41	0.0315029	0	0	0.018245	0
Advanced	60A	1- 5 cm	Wet	2014	6000	41	0.0222014	0	0.0166663	0	0
Advanced	60A	1- 5 cm	Dry	2015	5800	39	0.023049	0	0	0.0505695	0
Advanced	60A	1- 5 cm	Wet	2015	5500	38	0.0345991	0	0	0.0257279	0
Advanced	60B	1- 5 cm	Dry	2010	6466.67	46	0.00913798	0	0	0	0
Advanced	60B	1- 5 cm	Wet	2010	6566.67	48	0.0337721	0	0.0565031	0	0.0476417
Advanced	60B	1- 5 cm	Dry	2011	6366.67	48	0.0239516	0	0	0	0
Advanced	60B	1- 5 cm	Wet	2011	6333.33	48	0.0228643	0	0.00765844	0	0
Advanced	60B	1- 5 cm	Dry	2012	6200	47	0.0117934	0	0	0.0155709	0
Advanced	60B	1- 5 cm	Wet	2012	5966.67	46	0.0364567	0	0	0.0288849	0
Advanced	60B	1- 5 cm	Dry	2013	5900	46	0.0142541	0	0.0236774	0	0
Advanced	60B	1- 5 cm	Wet	2013	5800	45	0	0	0	0.0326285	0
Advanced	60B	1- 5 cm	Dry	2014	5466.67	45	0.029319	0	0.00416167	0	0
Advanced	60B	1- 5 cm	Wet	2014	5633.33	46	0.00732159	0	0.0515007	0	0.026759
Advanced	60B	1- 5 cm	Dry	2015	5633.33	46	0	0	0	0	0
Advanced	60B	1- 5 cm	Wet	2015	5633.33	46	0.00639268	0	0.0320088	0	0
Advanced	60C	1- 5 cm	Dry	2010	7366.67	36	0.0281962	0	0.00402181	0.0247083	0
Advanced	60C	1- 5 cm	Wet	2010	7133.33	35	0.0105191	0	0.00526537	0.0322377	0
Advanced	60C	1- 5 cm	Dry	2011	6933.33	33	0.0243871	0	0	0.0427416	0
Advanced	60C	1- 5 cm	Wet	2011	6833.33	32	0.0160578	0	0	0.0502501	0
Advanced	60C	1- 5 cm	Dry	2012	6500	31	0.0277835	0	0	0.0222226	0
Advanced	60C	1- 5 cm	Wet	2012	6400	32	0.0278519	0	0.0140041	0	0.0442192
Advanced	60C	1- 5 cm	Dry	2013	6266.67	32	0.00902219	0	0	0	0
Advanced	60C	1- 5 cm	Wet	2013	6133.33	32	0.0153823	0	0	0	0
Advanced	60C	1- 5 cm	Dry	2014	5833.33	29	0.0365456	0	0	0.0704733	0
Advanced	60C	1- 5 cm	Wet	2014	5733.33	30	0.0260468	0	0.0195906	0	0.0394539
Advanced	60C	1- 5 cm	Dry	2015	5733.33	30	0.0056482	0	0	0	0
Advanced	60C	1- 5 cm	Wet	2015	5633.33	30	0.0376425	0	0.0251541	0	0
Intermediate	15B	> 5 cm	Dry	2010	1690	15	0.0164981	0	0.027443	0	0
Intermediate	15B	> 5 cm	Wet	2010	1640	15	0.0264803	0.275533	0.0132686	0	0
Intermediate	15B	> 5 cm	Dry	2011	1620	15	0.0141256	0	0.00938411	0	0
Intermediate	15B	> 5 cm	Wet	2011	1560	15	0.0909706	0	0.027848	0	0
Intermediate	15B	> 5 cm	Dry	2012	1630	15	0	0	0.0389536	0	0
Intermediate	15B	> 5 cm	Wet	2012	1650	15	0.0159757	0	0.0321303	0	0
Intermediate	15B	> 5 cm	Dry	2013	1690	15	0.0102109	0	0.0355858	0	0
Intermediate	15B	> 5 cm	Wet	2013	1710	15	0.00856494	0	0.0693345	0	0
Intermediate	15B	> 5 cm	Dry	2014	1650	15	0.0439238	0	0.0217154	0	0
Intermediate	15B	> 5 cm	Wet	2014	1660	15	0	0	0.0214568	0	0
Intermediate	15B	> 5 cm	Dry	2015	1640	14	0.0226997	0.237242	0.00566988	0.0628834	0
Intermediate	15B	> 5 cm	Wet	2015	1620	14	0.0397062	0	0.0199009	0	0
Intermediate	15C	> 5 cm	Dry	2010	1210	14	0.00775781	0.0133324	0	0	0
Intermediate	15C	> 5 cm	Wet	2010	1220	15	0.0094866	0	0.0190081	0	0.0824686
Intermediate	15C	> 5 cm	Dry	2011	1220	15	0	0	0	0	0
Intermediate	15C	> 5 cm	Wet	2011	1200	15	0.0511298	0.0433818	0.0259303	0	0
Intermediate	15C	> 5 cm	Dry	2012	1190	15	0.00590595	0	0	0	0
Intermediate	15C	> 5 cm	Wet	2012	1190	15	0	0	0.012011	0	0
Intermediate	15C	> 5 cm	Dry	2013	1190	15	0.0071425	0	0	0	0
Intermediate	15C	> 5 cm	Wet	2013	1210	15	0.0366169	0.0196816	0.0619767	0	0
Intermediate	15C	> 5 cm	Dry	2014	1200	15	0	0	0	0	0
Intermediate	15C	> 5 cm	Wet	2014	1200	15	0.0095656	0	0.00957745	0	0
Intermediate	15C	> 5 cm	Dry	2015	1190	15	0	0	0	0	0
Intermediate	15C	> 5 cm	Wet	2015	1210	16	0	0	0.0182831	0	0.0726764
Intermediate	17A	> 5 cm	Dry	2010	1170	12	0.00818788	0	0.0245388	0	0
Intermediate	17A	> 5 cm	Wet	2010	1110	11	0.0486288	0.0484225	0.00976149	0.0945429	0
Intermediate	17A	> 5 cm	Dry	2011	1050	11	0.0420904	0	0	0	0
Intermediate	17A	> 5 cm	Wet	2011	1040	11	0.0283775	0	0.0142901	0	0
Intermediate	17A	> 5 cm	Dry	2012	1090	14	0.0139189	0	0.048143	0	0.190151
Intermediate	17A	> 5 cm	Wet	2012	1060	14	0.0132698	0	0	0	0
Intermediate	17A	> 5 cm	Dry	2013	1140	16	0	0	0.0490472	0	0.123136
Intermediate	17A	> 5 cm	Wet	2013	1150	15	0.0133192	0.0296875	0.0268214	0.0935501	0
Intermediate	17A	> 5 cm	Dry	2014	1130	16	0.0200788	0	0.00666573	0	0.0507692
Intermediate	17A	> 5 cm	Wet	2014	1140	16	0.0286581	0	0.0478993	0	0
Intermediate	17A	> 5 cm	Dry	2015	1130	16	0.00885033	0	0	0	0
Intermediate	17A	> 5 cm	Wet	2015	1140	16	0.00887981	0	0.0177604	0	0
Intermediate	15B	1- 5 cm	Dry	2010	8633.33	18	0.0468197	0	0	0.0484073	0
Intermediate	15B	1- 5 cm	Wet	2010	8466.67	18	0.0086477	0	0.00432687	0	0
Intermediate	15B	1- 5 cm	Dry	2011	8300	17	0.00911361	0	0	0.0430887	0
Intermediate	15B	1- 5 cm	Wet	2011	7600	17	0.0712701	0	0	0	0
Intermediate	15B	1- 5 cm	Dry	2012	7133.33	17	0.0336907	0	0	0	0
Intermediate	15B	1- 5 cm	Wet	2012	7266.67	17	0.0303691	0	0.0428803	0	0
Intermediate	15B	1- 5 cm	Dry	2013	7266.67	16	0.00386191	0	0.00771542	0.0497413	0
Intermediate	15B	1- 5 cm	Wet	2013	7033.33	16	0.0198841	0	0	0	0
Intermediate	15B	1- 5 cm	Dry	2014	6900	16	0.00353488	0	0	0	0
Intermediate	15B	1- 5 cm	Wet	2014	6766.67	15	0	0	0.00569436	0.0732217	0
Intermediate	15B	1- 5 cm	Dry	2015	6833.33	16	0.0232032	0	0	0	0.0626379
Intermediate	15B	1- 5 cm	Wet	2015	6600	16	0.0211927	0	0.0265414	0	0
Intermediate	15C	1- 5 cm	Dry	2010	9266.67	31	0	0	0	0	0
Intermediate	15C	1- 5 cm	Wet	2010	9166.67	32	0.0206303	0	0.0124047	0	0.0371391
Intermediate	15C	1- 5 cm	Dry	2011	9033.33	32	0.0111337	0	0.00277743	0	0
Intermediate	15C	1- 5 cm	Wet	2011	9066.67	32	0.0172256	0	0.0231342	0	0
Intermediate	15C	1- 5 cm	Dry	2012	8900	32	0.0078501	0	0	0	0
Intermediate	15C	1- 5 cm	Wet	2012	8833.33	33	0.0159925	0	0.0214428	0	0.0448817
Intermediate	15C	1- 5 cm	Dry	2013	8766.67	32	0.00641436	0	0.0096079	0.0257994	0
Intermediate	15C	1- 5 cm	Wet	2013	8666.67	32	0.0405547	0	0.0352241	0	0
Intermediate	15C	1- 5 cm	Dry	2014	8300	32	0.00834233	0	0	0	0
Intermediate	15C	1- 5 cm	Wet	2014	8500	34	0.00927815	0	0.0325645	0	0.0725867
Intermediate	15C	1- 5 cm	Dry	2015	8333.33	33	0.00374994	0	0	0.0281404	0
Intermediate	15C	1- 5 cm	Wet	2015	8233.33	33	0.0260618	0	0.00434897	0	0
Intermediate	17A	1- 5 cm	Dry	2010	7833.33	40	0.00797967	0	0.00398834	0	0.0241196
Intermediate	17A	1- 5 cm	Wet	2010	7800	39	0.0145579	0	0.00971993	0.0284844	0
Intermediate	17A	1- 5 cm	Dry	2011	7633.33	38	0.0165752	0	0	0.0199001	0
Intermediate	17A	1- 5 cm	Wet	2011	7333.33	37	0.0386537	0	0	0.0388222	0
Intermediate	17A	1- 5 cm	Dry	2012	7100	37	0.0198397	0	0	0	0
Intermediate	17A	1- 5 cm	Wet	2012	6966.67	37	0.0338433	0	0.054894	0	0
Intermediate	17A	1- 5 cm	Dry	2013	7500	38	0.0124947	0	0.0744901	0	0.0234629
Intermediate	17A	1- 5 cm	Wet	2013	7500	38	0.00675604	0	0.0271807	0	0
Intermediate	17A	1- 5 cm	Dry	2014	7433.33	38	0	0	0.0034086	0	0
Intermediate	17A	1- 5 cm	Wet	2014	7000	37	0.0389359	0	0.00487563	0.0285736	0
Intermediate	17A	1- 5 cm	Dry	2015	6733.33	36	0	0	0	0.0272663	0
Intermediate	17A	1- 5 cm	Wet	2015	6866.67	36	0.0197618	0	0.0296412	0	0
Early	3A	> 5 cm	Dry	2010	150	4	0	0	0.0742147	0	0
Early	3A	> 5 cm	Wet	2010	280	5	0	0	0.963001	0	0.272691
Early	3A	> 5 cm	Dry	2011	280	5	0	0	0	0	0
Early	3A	> 5 cm	Wet	2011	370	7	0	0	0.493	0	0.622299
Early	3A	> 5 cm	Dry	2012	450	7	0	0	0.158482	0	0
Early	3A	> 5 cm	Wet	2012	600	7	0	0	0.406572	0	0
Early	3A	> 5 cm	Dry	2013	690	8	0	0	0.129238	0	0.123136
Early	3A	> 5 cm	Wet	2013	710	8	0.0207741	0	0.0631119	0	0
Early	3A	> 5 cm	Dry	2014	800	10	0	0	0.0930392	0	0.180966
Early	3A	> 5 cm	Wet	2014	950	12	0	0	0.226045	0	0.241364
Early	3A	> 5 cm	Dry	2015	1020	12	0	0	0.0688508	0	0
Early	3A	> 5 cm	Wet	2015	1100	13	0.0330937	0	0.122383	0	0.0944296
Early	3B	> 5 cm	Dry	2010	350	6	0	0	0	0	0
Early	3B	> 5 cm	Wet	2010	400	6	0	0	0.15622	0	0
Early	3B	> 5 cm	Dry	2011	400	6	0	0	0	0	0
Early	3B	> 5 cm	Wet	2011	540	7	0	0	0.475061	0	0.220985
Early	3B	> 5 cm	Dry	2012	590	7	0	0	0.0718734	0	0
Early	3B	> 5 cm	Wet	2012	810	11	0	0	0.459764	0	0.715152
Early	3B	> 5 cm	Dry	2013	860	12	0	0	0.0619843	0	0.0759757
Early	3B	> 5 cm	Wet	2013	970	12	0	0	0.166536	0	0
Early	3B	> 5 cm	Dry	2014	1060	15	0	0	0.0733936	0	0.174771
Early	3B	> 5 cm	Wet	2014	1100	15	0	0	0.0449054	0	0
Early	3B	> 5 cm	Dry	2015	1260	16	0	0	0.14022	0	0.0643472
Early	3B	> 5 cm	Wet	2015	1400	17	0	0	0.130059	0	0.0681223
Early	5C	> 5 cm	Dry	2010	230	8	0	0	0	0	0
Early	5C	> 5 cm	Wet	2010	320	11	0	0	0.44126	0	0.422578
Early	5C	> 5 cm	Dry	2011	320	11	0	0	0	0	0
Early	5C	> 5 cm	Wet	2011	370	12	0	0	0.210154	0	0.121111
Early	5C	> 5 cm	Dry	2012	370	12	0	0	0	0	0
Early	5C	> 5 cm	Wet	2012	600	12	0	0	0.774084	0	0
Early	5C	> 5 cm	Dry	2013	670	12	0	0	0.0997227	0	0
Early	5C	> 5 cm	Wet	2013	780	12	0	0	0.23807	0	0
Early	5C	> 5 cm	Dry	2014	820	12	0	0	0.0376685	0	0
Early	5C	> 5 cm	Wet	2014	940	13	0	0	0.177061	0	0.100254
Early	5C	> 5 cm	Dry	2015	970	13	0	0	0.030822	0	0
Early	5C	> 5 cm	Wet	2015	1040	13	0	0	0.078205	0	0
Early	3A	1- 5 cm	Dry	2010	8633.33	26	0.0194617	0	0	0	0
Early	3A	1- 5 cm	Wet	2010	8466.67	25	0.0502624	0	0.0588957	0.0417389	0
Early	3A	1- 5 cm	Dry	2011	8100	24	0.0257541	0	0.00641495	0.032734	0
Early	3A	1- 5 cm	Wet	2011	7866.67	24	0.0353131	0	0	0	0
Early	3A	1- 5 cm	Dry	2012	7666.67	23	0.00637574	0	0	0.0314793	0
Early	3A	1- 5 cm	Wet	2012	7966.67	27	0.0205904	0	0.0882422	0	0.209427
Early	3A	1- 5 cm	Dry	2013	8233.33	27	0.0218681	0	0.0543619	0	0
Early	3A	1- 5 cm	Wet	2013	7733.33	27	0.0634103	0	0.0116643	0	0
Early	3A	1- 5 cm	Dry	2014	7400	27	0.0128803	0	0.0128239	0	0
Early	3A	1- 5 cm	Wet	2014	7166.67	28	0.037282	0	0.0106925	0	0.044071
Early	3A	1- 5 cm	Dry	2015	7000	28	0.00435664	0	0	0	0
Early	3A	1- 5 cm	Wet	2015	7100	30	0.0107298	0	0.0538422	0	0.0808813
Early	3B	1- 5 cm	Dry	2010	14433.3	31	0	0	0	0	0
Early	3B	1- 5 cm	Wet	2010	14466.7	32	0.00752927	0	0.0150721	0	0.035115
Early	3B	1- 5 cm	Dry	2011	14233.3	31	0.00762231	0	0	0.0258946	0
Early	3B	1- 5 cm	Wet	2011	13900	29	0.0211814	0	0.00303433	0.0827539	0
Early	3B	1- 5 cm	Dry	2012	13500	29	0.0094103	0	0.00187912	0	0
Early	3B	1- 5 cm	Wet	2012	13666.7	33	0	0	0.0325041	0	0.16676
Early	3B	1- 5 cm	Dry	2013	14233.3	34	0.0102733	0	0.0449704	0	0.0254422
Early	3B	1- 5 cm	Wet	2013	13733.3	35	0.0360119	0	0.00725833	0	0.0458847
Early	3B	1- 5 cm	Dry	2014	13233.3	35	0.00526144	0	0	0	0
Early	3B	1- 5 cm	Wet	2014	13100	34	0.00895498	0	0.00597698	0.0337915	0
Early	3B	1- 5 cm	Dry	2015	13066.7	35	0.00737706	0	0	0	0.0284057
Early	3B	1- 5 cm	Wet	2015	13000	36	0.0193965	0	0.0222044	0	0.031097
Early	5C	1- 5 cm	Dry	2010	16300	25	0.00421773	0	0	0	0
Early	5C	1- 5 cm	Wet	2010	16033.3	25	0.0293825	0	0.0271965	0	0
Early	5C	1- 5 cm	Dry	2011	15966.7	25	0	0	0	0	0
Early	5C	1- 5 cm	Wet	2011	15266.7	24	0.0490785	0	0	0.052221	0
Early	5C	1- 5 cm	Dry	2012	14333.3	23	0.0381705	0	0	0.0330872	0
Early	5C	1- 5 cm	Wet	2012	14133.3	24	0.0220245	0	0.0331794	0	0.0517658
Early	5C	1- 5 cm	Dry	2013	14300	24	0.0101668	0	0.0304017	0	0
Early	5C	1- 5 cm	Wet	2013	13766.7	24	0.00654303	0	0	0	0
Early	5C	1- 5 cm	Dry	2014	13600	24	0	0	0	0	0
Early	5C	1- 5 cm	Wet	2014	13533.3	25	0.0175283	0	0.0205128	0	0.0499329
Early	5C	1- 5 cm	Dry	2015	13500	24	0	0	0	0.0386772	0
Early	5C	1- 5 cm	Wet	2015	13100	25	0.0266552	0	0.00533746	0	0.0451006
